# Supplementary material for: Colour Response in Western Flower Thrips Varies Intraspecifically
Source: MDPI journal article supplement (doi:10.3390/insects13060538), 2022-06-10
Supplement: s1 [file s1]

Lopez-Reyes et al., Colour Response in Western Flower Thrips varies intraspecifically

### Supplementary material

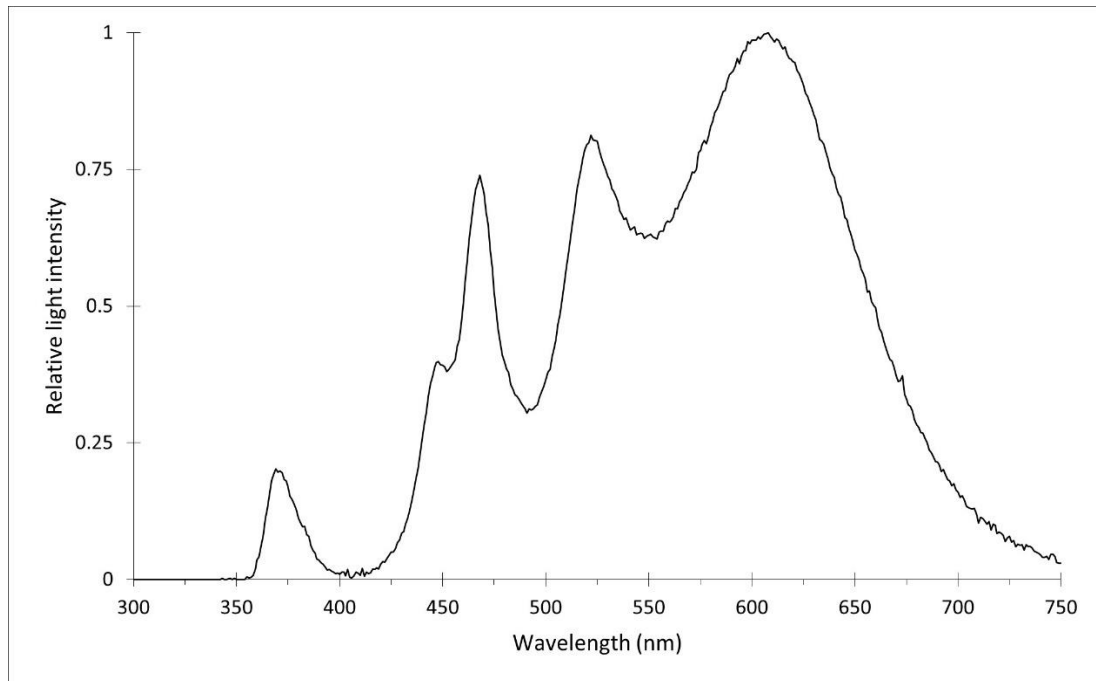

**Supplemental Figure S1.** Light spectrum of ceiling illumination inside the wind tunnel. The UV-A spectrum (365-390 nm) represents 2% of the amount of light found in the visible light spectrum (400-750 nm).

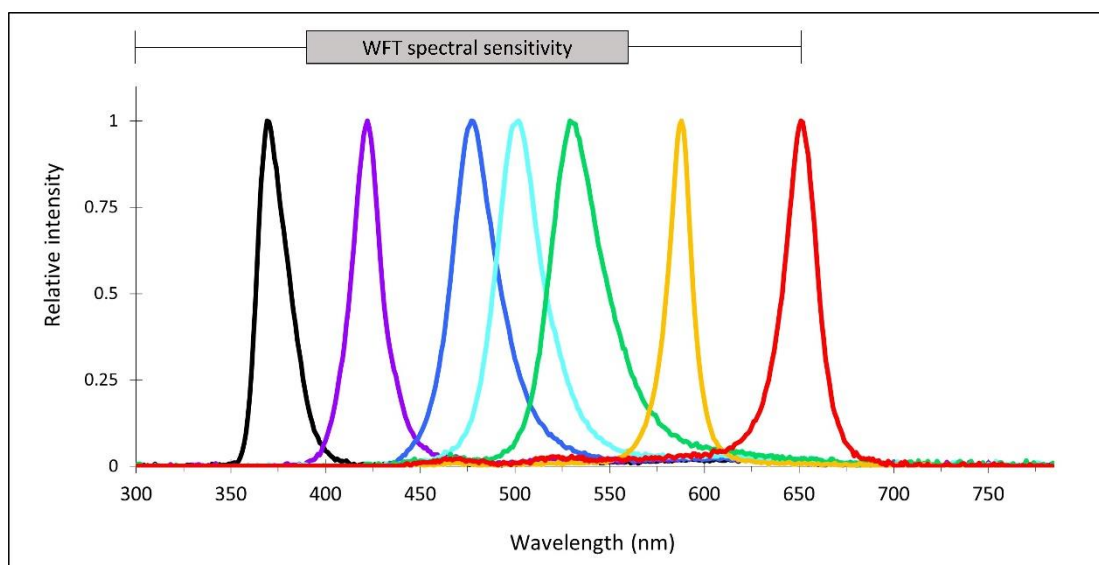

**Supplemental Figure S2.** Light spectra of LEDs inside the wind tunnel used for Experiment *i*, *ii* and *iii*.

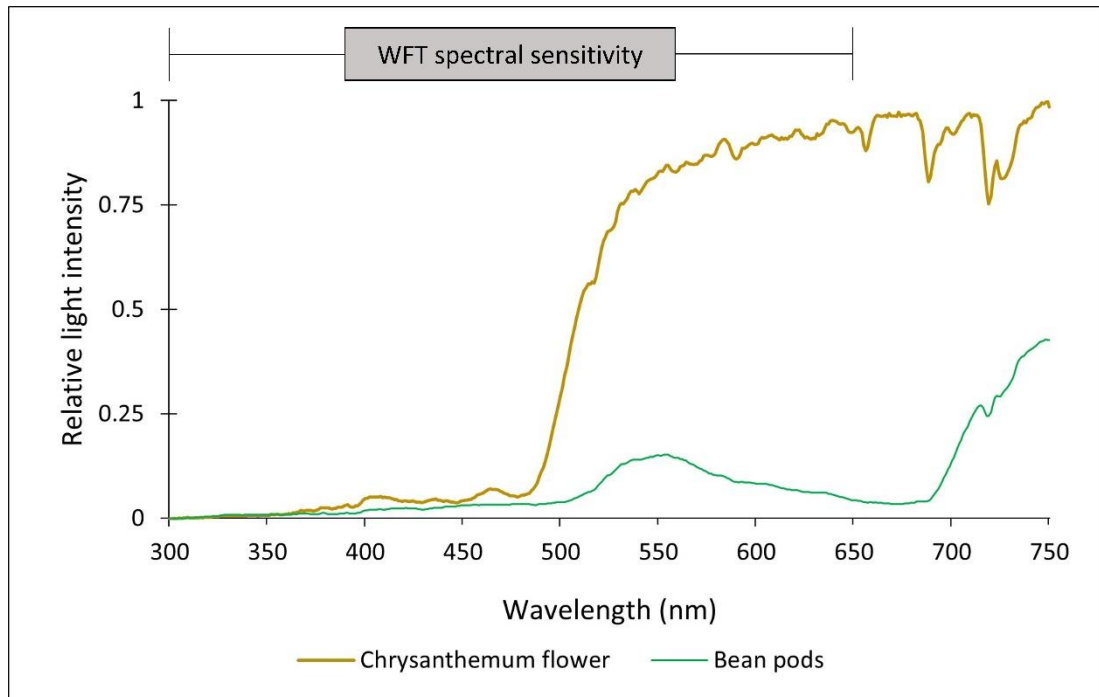

**Supplemental Figure S3.** Reflectance spectra of chrysanthemum flower and bean pods used for rearing of WFT.

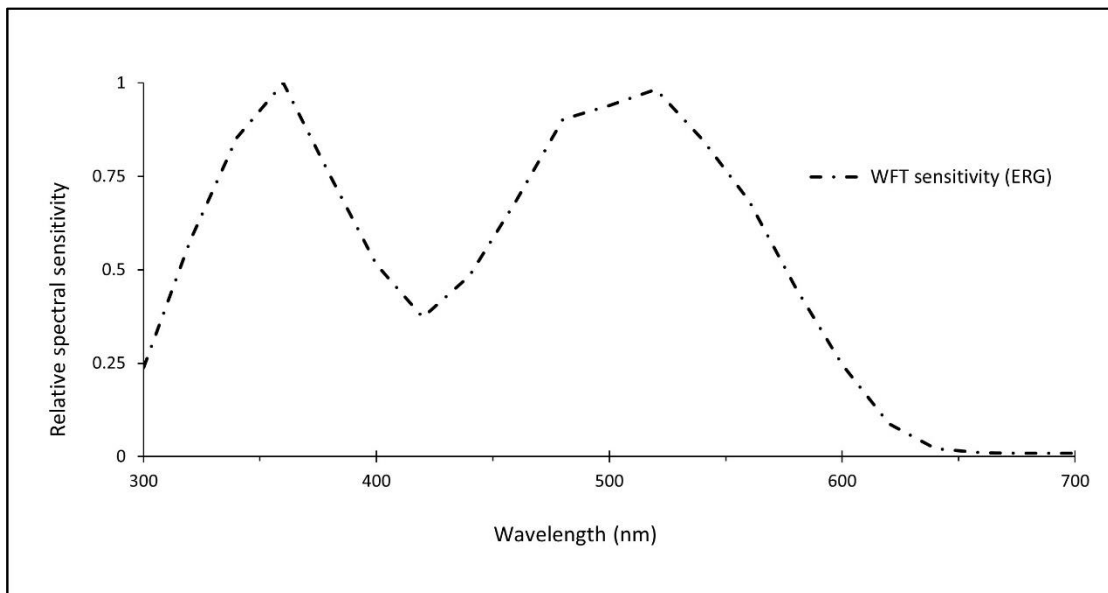

**Supplemental Figure S4.** Whole eye electroretinogram (ERG) spectral sensitivity curve of western flower thrips (WFT) (*Frankliniella occidentalis*) adapted from Otani et al. [104].

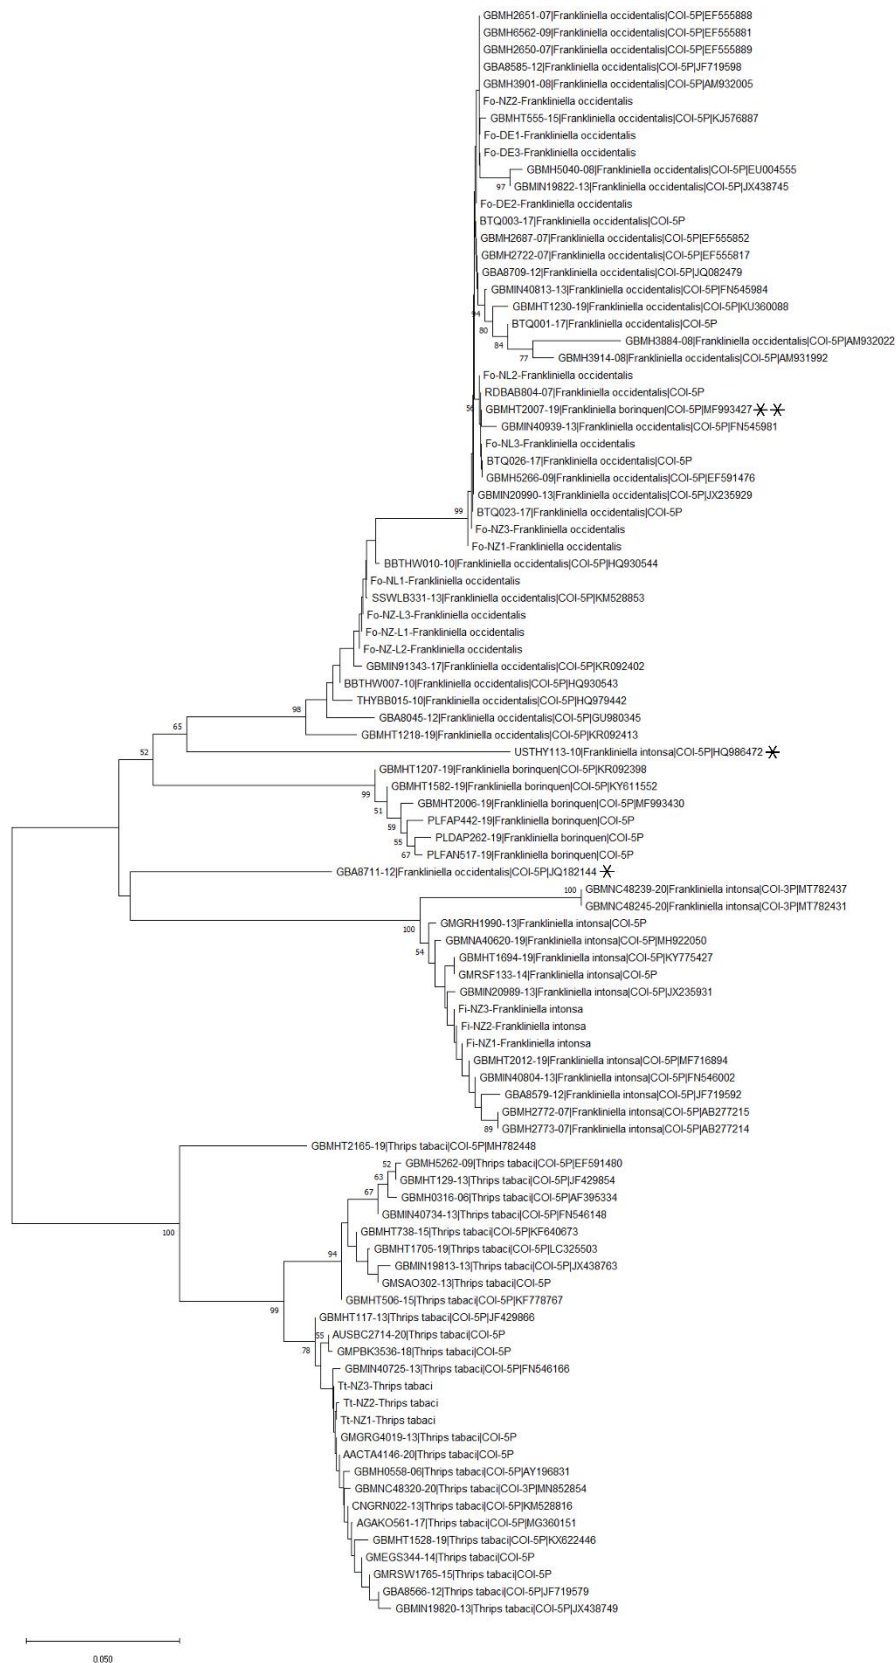

**Supplemental Figure S5.** COI barcode neighbour-joining tree of sequences generated here for *F. occidentalis* Dutch (Fo-NL1-3) and German (Fo-DE1-3) colonies, New Zealand “glasshouse” (Fo-NZ1-3) and “lupin” strains (Fo-NZ-L1-3), plus New Zealand *F. intonsa* (Fi-NZ1-3) and *Thrips tabaci* (Tt-NZ1-3), together with additional independent Genbank data (**Supplemental Table S3**). Posterior probabilities above 50% are illustrated.

\* Reference sequences “GBA8711-12|Frankliniella occidentalis” and “USTHY113-10|Frankliniella intonsa” are considered to be a result of Long Branch Attraction (LBA).

\*\* Reference sequence “GBMHT2007-19|Frankliniella borinquen” is likely to have been misidentified Virgilio et al. [105] in the database based on its position inside the *F. occidentalis* clade and it is not likely to be a result of LBA.

**Supplemental Table S1.** Specifications of LEDs used (high power 1Watt) for Experiment *i* and *ii*.

| LED colour | Manufacturer               | Model        | Peak wavelength (nm) |
|------------|----------------------------|--------------|----------------------|
| UV-A       | Roithner LaserTechnik GmbH | H2A1-H365-r4 | 369                  |
| Violet     | Roithner LaserTechnik GmbH | H2A1-H420    | 422                  |
| Blue       | Roithner LaserTechnik GmbH | H2A1-H470    | 477                  |
| Cyan       | Roithner LaserTechnik GmbH | H2A1-H490    | 502                  |
| Green      | Unknown                    | Unknown      | 529                  |
| Yellow     | Roithner LaserTechnik GmbH | H2A3-H590    | 588                  |
| Red        | Roithner LaserTechnik GmbH | H2A1-H650    | 651                  |

**Supplemental Table S2.** General information of the 18 specimens used for generating DNA barcode sequences of the thrips used to support species identification and phylogenetic analysis of the Dutch and German *Frankliniella occidentalis* colonies used in this study.

| No. | Specimen code and species                            | Country collected   | Collection date | Other information                                         | GenBank accession number of COI gene sequence |
|-----|------------------------------------------------------|---------------------|-----------------|-----------------------------------------------------------|-----------------------------------------------|
| 1   | Fo-NZ1 - <i>Frankliniella occidentalis</i> (NZ)      | New Zealand         | September, 2020 | Laboratory reared colony on chrysanthemum <sup>a</sup>    | ON310568                                      |
| 2   | Fo-NZ2 - <i>Frankliniella occidentalis</i> (NZ)      | New Zealand         | September, 2020 | Laboratory reared colony on chrysanthemum <sup>a</sup>    | ON310569                                      |
| 3   | Fo-NZ3 - <i>Frankliniella occidentalis</i> (NZ)      | New Zealand         | September, 2020 | Laboratory reared colony on chrysanthemum <sup>a</sup>    | ON310570                                      |
| 4   | Fo-NL1 - <i>Frankliniella occidentalis</i> (Dutch)   | The Netherlands     | August, 2020    | Laboratory reared NL colony on chrysanthemum <sup>b</sup> | ON310562                                      |
| 5   | Fo-NL2 - <i>Frankliniella occidentalis</i> (Dutch)   | The Netherlands     | August, 2020    | Laboratory reared NL colony on chrysanthemum <sup>b</sup> | ON310563                                      |
| 6   | Fo-NL3 - <i>Frankliniella occidentalis</i> (Dutch)   | The Netherlands     | August, 2020    | Laboratory reared NL colony on chrysanthemum <sup>b</sup> | ON310564                                      |
| 7   | Fo-DE1 - <i>Frankliniella occidentalis</i> (German)  | Germany             | March, 2020     | Laboratory reared DE colony on bean <sup>c</sup>          | ON310565                                      |
| 8   | Fo-DE2 - <i>Frankliniella occidentalis</i> (German)  | Germany             | March, 2020     | Laboratory reared DE colony on bean <sup>c</sup>          | ON310566                                      |
| 9   | Fo-DE3 - <i>Frankliniella occidentalis</i> (German)  | Germany             | March, 2020     | Laboratory reared DE colony on bean <sup>c</sup>          | ON310567                                      |
| 10  | Fo-NZ-L1 - <i>Frankliniella occidentalis</i> (Lupin) | Rakaia, New Zealand | January, 2019   | Collected on yellow tree Lupin                            | ON310571                                      |
| 11  | Fo-NZ-L2 - <i>Frankliniella occidentalis</i> (Lupin) | Rakaia, New Zealand | January, 2019   | Collected on yellow tree Lupin                            | ON310572                                      |
| 12  | Fo-NZ-L3 - <i>Frankliniella occidentalis</i> (Lupin) | Rakaia, New Zealand | January, 2019   | Collected on yellow tree Lupin                            | ON310573                                      |
| 13  | Fi-NZ1 - <i>Frankliniella intonsa</i>                | New Zealand         | April, 2021     | Laboratory reared colony on bean pods <sup>a</sup>        | ON310574                                      |
| 14  | Fi-NZ2 - <i>Frankliniella intonsa</i>                | New Zealand         | April, 2021     | Laboratory reared colony on bean pods <sup>a</sup>        | ON310575                                      |
| 15  | Fi-NZ3 - <i>Frankliniella intonsa</i>                | New Zealand         | April, 2021     | Laboratory reared colony on bean pods <sup>a</sup>        | ON310576                                      |
| 16  | Tt-NZ1 - <i>Thrips tabaci</i>                        | New Zealand         | April, 2021     | Laboratory reared colony on onion <sup>a</sup>            | ON310577                                      |
| 17  | Tt-NZ2 - <i>Thrips tabaci</i>                        | New Zealand         | April, 2021     | Laboratory reared colony on onion <sup>a</sup>            | ON310578                                      |
| 18  | Tt-NZ3 - <i>Thrips tabaci</i>                        | New Zealand         | April, 2021     | Laboratory reared colony on onion <sup>a</sup>            | ON310579                                      |

<sup>a</sup> Plant and Food Research Ltd, Lincoln, Canterbury; <sup>b</sup> Wageningen University and Research; <sup>c</sup> Leibniz University Hannover

**Supplemental Table S3.** Reference sequences of *Frankliniella occidentalis*, *F. intonsa*, *F. borinquen* and *Thrips tabaci* downloaded from BOLD database for phylogenetic analysis.

| No. | Name                                     | Country         | BOLD sequence ID | Name                                                     |
|-----|------------------------------------------|-----------------|------------------|----------------------------------------------------------|
| 1   | GBMHT1207-19 Frankliniella borinquen     | Mexico          | GBMHT1207-19     | GBMHT1207-19 Frankliniella borinquen COI-5P KR092398     |
| 2   | GBMHT1582-19 Frankliniella borinquen     | Mexico          | GBMHT1582-19     | GBMHT1582-19 Frankliniella borinquen COI-5P KY611552     |
| 3   | GBMHT2006-19 Frankliniella borinquen     | Mexico          | GBMHT2006-19     | GBMHT2006-19 Frankliniella borinquen COI-5P MF993430     |
| 4   | GBMHT2007-19 Frankliniella borinquen     | Mexico          | GBMHT2007-19     | GBMHT2007-19 Frankliniella borinquen COI-5P MF993427     |
| 5   | PLDAP262-19 Frankliniella borinquen      | Costa Rica      | PLDAP262-19      | PLDAP262-19 Frankliniella borinquen COI-5P               |
| 6   | PLFAN517-19 Frankliniella borinquen      | Costa Rica      | PLFAN517-19      | PLFAN517-19 Frankliniella borinquen COI-5P               |
| 7   | PLFAP442-19 Frankliniella borinquen      | Costa Rica      | PLFAP442-19      | PLFAP442-19 Frankliniella borinquen COI-5P               |
| 8   | GBA8579-12 Frankliniella intonsa         | China           | GBA8579-12       | GBA8579-12 Frankliniella intonsa COI-5P JX235932         |
| 9   | GBMH2772-07 Frankliniella intonsa        | Japan           | GBMH2772-07      | GBMH2772-07 Frankliniella intonsa COI-5P AB277215        |
| 10  | GBMH2773-07 Frankliniella intonsa        | Japan           | GBMH2773-07      | GBMH2773-07 Frankliniella intonsa COI-5P AB277214        |
| 11  | GBMHT1694-19 Frankliniella intonsa       | NA              | GBMHT1694-19     | GBMHT1694-19 Frankliniella intonsa COI-5P KY775427       |
| 12  | GBMHT2012-19 Frankliniella intonsa       | China           | GBMHT2012-19     | GBMHT2012-19 Frankliniella intonsa COI-5P MF716894       |
| 13  | GBMIN20989-13 Frankliniella intonsa      | Serbia          | GBMIN20989-13    | GBMIN20989-13 Frankliniella intonsa COI-5P JX235931      |
| 14  | GBMIN40804-13 Frankliniella intonsa      | United Kingdom  | GBMIN40804-13    | GBMIN40804-13 Frankliniella intonsa COI-5P FN546002      |
| 15  | GBMNA40620-19 Frankliniella intonsa      | NA              | GBMNA40620-19    | GBMNA40620-19 Frankliniella intonsa COI-5P MH922050      |
| 16  | GBMNC48239-20 Frankliniella intonsa      | NA              | GBMNC48239-20    | GBMNC48239-20 Frankliniella intonsa COI-3P MT782437      |
| 17  | GBMNC48245-20 Frankliniella intonsa      | NA              | GBMNC48245-20    | GBMNC48245-20 Frankliniella intonsa COI-3P MT782431      |
| 18  | GMGRH1990-13 Frankliniella intonsa       | Germany         | GMGRH1990-13     | GMGRH1990-13 Frankliniella intonsa COI-5P                |
| 19  | GMRSF133-14 Frankliniella intonsa        | Russia          | GMRSF133-14      | GMRSF133-14 Frankliniella intonsa COI-5P                 |
| 20  | USTHY113-10 Frankliniella intonsa        | USA             | USTHY113-10      | USTHY113-10 Frankliniella intonsa COI-5P HQ986472        |
| 21  | AACTA4146-20 Thrips tabaci               | Australia       | AACTA4146-20     | AACTA4146-20 Thrips tabaci COI-5P                        |
| 22  | AGAKO561-17 Thrips tabaci                | Canada          | AGAKO561-17      | AGAKO561-17 Thrips tabaci COI-5P MG360151                |
| 23  | AUSBC2714-20 Thrips tabaci               | Australia       | AUSBC2714-20     | AUSBC2714-20 Thrips tabaci COI-5P                        |
| 24  | CNGRN022-13 Thrips tabaci                | Canada          | CNGRN022-13      | CNGRN022-13 Thrips tabaci COI-5P KM528816                |
| 25  | GBA8566-12 Thrips tabaci                 | China           | GBA8566-12       | GBA8566-12 Thrips tabaci COI-5P JF719579                 |
| 26  | GBMH0316-06 Thrips tabaci                | NA              | GBMH0316-06      | GBMH0316-06 Thrips tabaci COI-5P AF395334                |
| 27  | GBMH0558-06 Thrips tabaci                | NA              | GBMH0558-06      | GBMH0558-06 Thrips tabaci COI-5P AY196831                |
| 28  | GBMH5262-09 Thrips tabaci                | New Zealand     | GBMH5262-09      | GBMH5262-09 Thrips tabaci COI-5P EF591480                |
| 29  | GBMHT117-13 Thrips tabaci                | USA             | GBMHT117-13      | GBMHT117-13 Thrips tabaci COI-5P JF429866                |
| 30  | GBMHT129-13 Thrips tabaci                | Peru            | GBMHT129-13      | GBMHT129-13 Thrips tabaci COI-5P JF429854                |
| 31  | GBMHT1528-19 Thrips tabaci               | India           | GBMHT1528-19     | GBMHT1528-19 Thrips tabaci COI-5P KX622446               |
| 32  | GBMHT1705-19 Thrips tabaci               | Japan           | GBMHT1705-19     | GBMHT1705-19 Thrips tabaci COI-5P LC325503               |
| 33  | GBMHT2165-19 Thrips tabaci               | Hungary         | GBMHT2165-19     | GBMHT2165-19 Thrips tabaci COI-5P MH782448               |
| 34  | GBMHT506-15 Thrips tabaci                | Kenya           | GBMHT506-15      | GBMHT506-15 Thrips tabaci COI-5P KF778767                |
| 35  | GBMHT738-15 Thrips tabaci                | NA              | GBMHT738-15      | GBMHT738-15 Thrips tabaci COI-5P KF640673                |
| 36  | GBMIN19813-13 Thrips tabaci              | Tanzania        | GBMIN19813-13    | GBMIN19813-13 Thrips tabaci COI-5P JX438763              |
| 37  | GBMIN19820-13 Thrips tabaci              | Madagascar      | GBMIN19820-13    | GBMIN19820-13 Thrips tabaci COI-5P JX438749              |
| 38  | GBMIN40725-13 Thrips tabaci              | United Kingdom  | GBMIN40725-13    | GBMIN40725-13 Thrips tabaci COI-5P FN546166              |
| 39  | GBMIN40734-13 Thrips tabaci              | Israel          | GBMIN40734-13    | GBMIN40734-13 Thrips tabaci COI-5P FN546148              |
| 40  | GBMNC48320-20 Thrips tabaci              | NA              | GBMNC48320-20    | GBMNC48320-20 Thrips tabaci COI-3P MN852854              |
| 41  | GMEGS344-14 Thrips tabaci                | Egypt           | GMEGS344-14      | GMEGS344-14 Thrips tabaci COI-5P                         |
| 42  | GMGRG4019-13 Thrips tabaci               | Germany         | GMGRG4019-13     | GMGRG4019-13 Thrips tabaci COI-5P                        |
| 43  | GMPBK3536-18 Thrips tabaci               | Pakistan        | GMPBK3536-18     | GMPBK3536-18 Thrips tabaci COI-5P                        |
| 44  | GMRSW1765-15 Thrips tabaci               | Russia          | GMRSW1765-15     | GMRSW1765-15 Thrips tabaci COI-5P                        |
| 45  | GMSAO302-13 Thrips tabaci                | South Africa    | GMSAO302-13      | GMSAO302-13 Thrips tabaci COI-5P                         |
| 46  | BBTHW007-10 Frankliniella occidentalis   | Canada          | BBTHW007-10      | BBTHW007-10 Frankliniella occidentalis COI-5P HQ930543   |
| 47  | BBTHW010-10 Frankliniella occidentalis   | Canada          | BBTHW010-10      | BBTHW010-10 Frankliniella occidentalis COI-5P HQ930544   |
| 48  | BTQ001-17 Frankliniella occidentalis     | Colombia        | BTQ001-17        | BTQ001-17 Frankliniella occidentalis COI-5P              |
| 49  | BTQ003-17 Frankliniella occidentalis     | Colombia        | BTQ003-17        | BTQ003-17 Frankliniella occidentalis COI-5P              |
| 50  | BTQ023-17 Frankliniella occidentalis     | The Netherlands | BTQ023-17        | BTQ023-17 Frankliniella occidentalis COI-5P              |
| 51  | BTQ026-17 Frankliniella occidentalis     | The Netherlands | BTQ026-17        | BTQ026-17 Frankliniella occidentalis COI-5P              |
| 52  | GBA8045-12 Frankliniella occidentalis    | NA              | GBA8045-12       | GBA8045-12 Frankliniella occidentalis COI-5P GU980345    |
| 53  | GBA8585-12 Frankliniella occidentalis    | China           | GBA8585-12       | GBA8585-12 Frankliniella occidentalis COI-5P JF719598    |
| 54  | GBA8709-12 Frankliniella occidentalis    | Australia       | GBA8709-12       | GBA8709-12 Frankliniella occidentalis COI-5P JX235929    |
| 55  | GBA8711-12 Frankliniella occidentalis    | USA             | GBA8711-12       | GBA8711-12 Frankliniella occidentalis COI-5P JQ182144    |
| 56  | GBMH2650-07 Frankliniella occidentalis   | USA             | GBMH2650-07      | GBMH2650-07 Frankliniella occidentalis COI-5P EF555889   |
| 57  | GBMH2651-07 Frankliniella occidentalis   | USA             | GBMH2651-07      | GBMH2651-07 Frankliniella occidentalis COI-5P EF555888   |
| 58  | GBMH2687-07 Frankliniella occidentalis   | New Zealand     | GBMH2687-07      | GBMH2687-07 Frankliniella occidentalis COI-5P EF555852   |
| 59  | GBMH2722-07 Frankliniella occidentalis   | Japan           | GBMH2722-07      | GBMH2722-07 Frankliniella occidentalis COI-5P EF555817   |
| 60  | GBMH3884-08 Frankliniella occidentalis   | South Africa    | GBMH3884-08      | GBMH3884-08 Frankliniella occidentalis COI-5P AM932022   |
| 61  | GBMH3901-08 Frankliniella occidentalis   | Croatia         | GBMH3901-08      | GBMH3901-08 Frankliniella occidentalis COI-5P AM932005   |
| 62  | GBMH3914-08 Frankliniella occidentalis   | Kenya           | GBMH3914-08      | GBMH3914-08 Frankliniella occidentalis COI-5P AM931992   |
| 63  | GBMH5040-08 Frankliniella occidentalis   | Kenya           | GBMH5040-08      | GBMH5040-08 Frankliniella occidentalis COI-5P EU004555   |
| 64  | GBMH5266-09 Frankliniella occidentalis   | Germany         | GBMH5266-09      | GBMH5266-09 Frankliniella occidentalis COI-5P EF591476   |
| 65  | GBMH6562-09 Frankliniella occidentalis   | China           | GBMH6562-09      | GBMH6562-09 Frankliniella occidentalis COI-5P EF555881   |
| 66  | GBMHT1218-19 Frankliniella occidentalis  | Mexico          | GBMHT1218-19     | GBMHT1218-19 Frankliniella occidentalis COI-5P KR092413  |
| 67  | GBMHT1230-19 Frankliniella occidentalis  | India           | GBMHT1230-19     | GBMHT1230-19 Frankliniella occidentalis COI-5P KU360088  |
| 68  | GBMHT555-15 Frankliniella occidentalis   | China           | GBMHT555-15      | GBMHT555-15 Frankliniella occidentalis COI-5P KJ576887   |
| 69  | GBMIN19822-13 Frankliniella occidentalis | Tanzania        | GBMIN19822-13    | GBMIN19822-13 Frankliniella occidentalis COI-5P JX438745 |
| 70  | GBMIN20990-13 Frankliniella occidentalis | Serbia          | GBMIN20990-13    | GBMIN20990-13 Frankliniella occidentalis COI-5P JX235929 |
| 71  | GBMIN40813-13 Frankliniella occidentalis | Italy           | GBMIN40813-13    | GBMIN40813-13 Frankliniella occidentalis COI-5P FN545984 |
| 72  | GBMIN40939-13 Frankliniella occidentalis | United Kingdom  | GBMIN40939-13    | GBMIN40939-13 Frankliniella occidentalis COI-5P FN545981 |
| 73  | GBMIN91343-17 Frankliniella occidentalis | Mexico          | GBMIN91343-17    | GBMIN91343-17 Frankliniella occidentalis COI-5P KR092402 |
| 74  | RDBAB804-07 Frankliniella occidentalis   | Canada          | RDBAB804-07      | RDBAB804-07 Frankliniella occidentalis COI-5P            |
| 75  | SSWLB331-13 Frankliniella occidentalis   | Canada          | SSWLB331-13      | SSWLB331-13 Frankliniella occidentalis COI-5P KM528853   |
| 76  | THYBB015-10 Frankliniella occidentalis   | USA             | THYBB015-10      | THYBB015-10 Frankliniella occidentalis COI-5P HQ979442   |

**Supplemental Table S4.** Results of species identification queries to the BOLD database for the 18 new sequences developed here. BOLD Identification System (IDS) (<https://www.boldsystems.org/>; accessed 05/03/2021).

| Specimen ID | Best ID                           | Consensus sequence length (bp) | Sequence similarity top match (%) | Sequence similarity low match (%) | Date of ID | Ambiguity                          |
|-------------|-----------------------------------|--------------------------------|-----------------------------------|-----------------------------------|------------|------------------------------------|
| Fo-NZ1      | <i>Frankliniella occidentalis</i> | 594                            | 100                               | 99.75                             | 18/05/2021 | ( <i>F. borinquen</i> possibility) |
| Fo-NZ2      | <i>Frankliniella occidentalis</i> | 594                            | 100                               | 99.82                             | 18/05/2021 | ( <i>F. borinquen</i> possibility) |
| Fo-NZ3      | <i>Frankliniella occidentalis</i> | 619                            | 100                               | 99.75                             | 18/05/2021 | ( <i>F. borinquen</i> possibility) |
| Fo-NL1      | <i>Frankliniella occidentalis</i> | 606                            | 100                               | 99.83                             | 18/05/2021 | solid ID                           |
| Fo-NL2      | <i>Frankliniella occidentalis</i> | 596                            | 100                               | 99.66                             | 18/05/2021 | ( <i>F. borinquen</i> possibility) |
| Fo-NL3      | <i>Frankliniella occidentalis</i> | 593                            | 100                               | 99.66                             | 18/05/2021 | ( <i>F. borinquen</i> possibility) |
| Fo-DE1      | <i>Frankliniella occidentalis</i> | 614                            | 100                               | 99.82                             | 19/05/2021 | ( <i>F. borinquen</i> possibility) |
| Fo-DE2      | <i>Frankliniella occidentalis</i> | 575                            | 100                               | 99.65                             | 19/05/2021 | ( <i>F. borinquen</i> possibility) |
| Fo-DE3      | <i>Frankliniella occidentalis</i> | 592                            | 100                               | 99.82                             | 19/05/2021 | ( <i>F. borinquen</i> possibility) |
| Fo-NZ-L1    | <i>Frankliniella occidentalis</i> | 578                            | 100                               | 99.66                             | 19/05/2021 | solid ID                           |
| Fo-NZ-L2    | <i>Frankliniella occidentalis</i> | 581                            | 100                               | 99.66                             | 19/05/2021 | solid ID                           |
| Fo-NZ-L3    | <i>Frankliniella occidentalis</i> | 591                            | 100                               | 99.66                             | 19/05/2021 | solid ID                           |
| Fi-NZ1      | <i>Frankliniella intonsa</i>      | 603                            | 99.83                             | 99.17                             | 18/05/2021 | solid ID                           |
| Fi-NZ2      | <i>Frankliniella intonsa</i>      | 602                            | 99.82                             | 99.29                             | 18/05/2021 | solid ID                           |
| Fi-NZ3      | <i>Frankliniella intonsa</i>      | 590                            | 99.83                             | 98.97                             | 18/05/2021 | solid ID                           |
| Tt-NZ1      | <i>Thrips tabaci</i>              | 637                            | 100                               | 100                               | 19/05/2021 | solid ID                           |
| Tt-NZ2      | <i>Thrips tabaci</i>              | 600                            | 100                               | 100                               | 19/05/2021 | solid ID                           |
| Tt-NZ3      | <i>Thrips tabaci</i>              | 614                            | 100                               | 100                               | 19/05/2021 | solid ID                           |

**Supplemental Table S5.** Mean  $\pm$  SE estimates of intra- and interspecific genetic distances of thrips COI gene sequences included in the phylogenetic analysis. Distances were calculated using the Kimura 2-parameter model with 1000 bootstrap replications. Intraspecific distances of each group are shown in in bold.

| Thrips groups                   | <i>Thrips tabaci</i>             | <i>F. occidentalis</i> (Lupin) | <i>F. occidentalis</i> (German)   | <i>F. intonsa</i>                | <i>F. occidentalis</i> (Dutch)   | <i>F. occidentalis</i>           | <i>F. borinquen</i>              |
|---------------------------------|----------------------------------|--------------------------------|-----------------------------------|----------------------------------|----------------------------------|----------------------------------|----------------------------------|
| <i>Thrips tabaci</i>            | <b>2.57 <math>\pm</math> 0.4</b> |                                |                                   |                                  |                                  |                                  |                                  |
| <i>F. occidentalis</i> (Lupin)  | 26.15 $\pm$ 2.6                  | <b>0.0</b>                     |                                   |                                  |                                  |                                  |                                  |
| <i>F. occidentalis</i> (German) | 25.55 $\pm$ 2.5                  | 3.28 $\pm$ 0.8                 | <b>0.12 <math>\pm</math> 0.12</b> |                                  |                                  |                                  |                                  |
| <i>F. intonsa</i>               | 24.64 $\pm$ 2.4                  | 22.27 $\pm$ 2.2                | 21.96 $\pm$ 2.1                   | <b>4.85 <math>\pm</math> 0.5</b> |                                  |                                  |                                  |
| <i>F. occidentalis</i> (Dutch)  | 26.01 $\pm$ 2.5                  | 2.31 $\pm$ 0.5                 | 1.18 $\pm$ 0.3                    | 22.32 $\pm$ 2.1                  | <b>2.08 <math>\pm</math> 0.5</b> |                                  |                                  |
| <i>F. occidentalis</i>          | 25.76 $\pm$ 2.5                  | 4.09 $\pm$ 0.8                 | 1.76 $\pm$ 0.2                    | 22.96 $\pm$ 2.2                  | 2.63 $\pm$ 0.4                   | <b>3.61 <math>\pm</math> 0.5</b> |                                  |
| <i>F. borinquen</i>             | 23.55 $\pm$ 2.3                  | 14.76 $\pm$ 1.6                | 15.28 $\pm$ 1.74                  | 21.82 $\pm$ 2.1                  | 15.18 $\pm$ 1.7                  | 16.05 $\pm$ 1.8                  | <b>5.72 <math>\pm</math> 0.6</b> |

**Supplemental Table S6.** Summary of results from *Experiment i*: mean percentage of Dutch WFT (NLc) caught on sticky plate of the LED lamp at seven different wavelengths as single choice treatments six hours after release (95% confidence limits).

| LED Colour | Peak wavelength (nm) | WFT caught (%)     |
|------------|----------------------|--------------------|
| UVA        | 369                  | 37.3 (28.5 - 46.9) |
| Violet     | 422                  | 12.8 (7.6 - 20.6)  |
| Blue       | 477                  | 21.0 (14.2 - 29.8) |
| Cyan       | 502                  | 7.5 (3.8 - 14.4)   |
| Green      | 529                  | 7.3 (3.6 - 14.1)   |
| Yellow     | 588                  | 35.5 (26.9 - 45.1) |
| Red        | 651                  | 10.8 (6.1 - 18.3)  |

**Supplemental Table S7.** Summary of results from *Experiment ii*. Mean percentage of German WFT(DEc) attracted to blue and yellow light six hours after release. Comparative data from **Supplemental Table S6** are included for Dutch WFT (NLc).

| Colony          | LED colour | Peak wavelength (nm) | Mean % WFT caught<br>(95% confidence limits), n=4 |
|-----------------|------------|----------------------|---------------------------------------------------|
| German<br>(DEc) | Blue       | 477                  | 33.8 (25.2, 43.5)                                 |
|                 | Yellow     | 588                  | 24.0 (16.7, 33.3)                                 |
| Dutch<br>(NLc)  | Blue       | 477                  | 21.0 (14.2, 29.8)                                 |
|                 | Yellow     | 588                  | 35.5 (26.9, 45.1)                                 |

**Supplemental Table S8.** Summary of results of *Experiment iii, analysis a*. Percentage of the different host reared WFT colonies on either yellow or blue light of only those that landed on the sticky glass plate of the LED lamp.

| Colony | Rearing regime <sup>1</sup> | Mean % WFT (95% confidence limits), n=6 |                  |
|--------|-----------------------------|-----------------------------------------|------------------|
|        |                             | Yellow                                  | Blue             |
| German | DEb                         | 22.3 (14.4,32.9)                        | 77.7 (67.1,85.6) |
|        | DEbc <sub>4-8</sub>         | 36.5 (27.1,47.1)                        | 63.5 (52.9,72.9) |
|        | DEbc <sub>12-14</sub>       | 39.7 (31.0,49.1)                        | 60.3 (50.9,69.0) |
| Dutch  | NLb                         | 50.0 (41.3,58.7)                        | 50.0 (41.3,58.7) |
|        | NLbc <sub>4-8</sub>         | 79.7 (71.2,86.2)                        | 20.3 (13.8,28.8) |
|        | NLbc <sub>12-14</sub>       | 67.2 (59.3,74.1)                        | 32.8 (25.9,40.7) |

<sup>1</sup> See Figure 1 in the manuscript



**Supplemental Table S9.** Summary of results for *Experiment iii, analysis b*. Distribution of different host reared WFT colonies at the four locations inside the wind tunnel six hours after release.

| Colony | Rearing regime <sup>1</sup> | Mean % WFT (95% confidence limits), n=6 |                  |                  |                  |
|--------|-----------------------------|-----------------------------------------|------------------|------------------|------------------|
|        |                             | <i>Elsewhere</i>                        | <i>Ceiling</i>   | <i>Yellow</i>    | <i>Blue</i>      |
| German | DEb                         | 57.9 (49.2,66.1)                        | 23.4 (16.9,31.5) | 4.2 (1.8,9.3)    | 14.5 (9.4,21.7)  |
|        | DEbc <sub>4-8</sub>         | 54.5 (45.7,63.0)                        | 23.9 (17.2,32.1) | 7.9 (4.3,14.1)   | 13.7 (8.7,20.9)  |
|        | DEbc <sub>12-14</sub>       | 50.6 (41.9,59.1)                        | 22.6 (16.2,30.7) | 10.7 (6.4,17.3)  | 16.2 (10.8,23.6) |
| Dutch  | NLb                         | 65.2 (56.5,73.1)                        | 3.9 (1.6,9.2)    | 15.4 (10.1,22.9) | 15.4 (10.1,22.8) |
|        | NLbc <sub>4-8</sub>         | 45.8 (37.3,54.6)                        | 26.5 (19.5,34.9) | 22.1 (15.7,30.3) | 5.6 (2.7,11.3)   |
|        | NLbc <sub>12-14</sub>       | 45.3 (36.9,54.0)                        | 17.2 (11.6,24.8) | 25.1 (18.4,33.4) | 12.3 (7.6,19.2)  |

<sup>1</sup> See Figure 1 in the manuscript

## References (Supplementary materials)

104. Otani, Y.; Wakakuwa, M.; Arikawa, K. Relationship between Action Spectrum and Spectral Sensitivity of Compound Eyes Relating Phototactic Behavior of the Western Flower Thrips, *Frankliniella Occidentalis*. *Jpn. J. Appl. Entomol. Zool.* **2014**, *58*, 177–185, doi:10/gn27z4.
105. Virgilio, M.; Backeljau, T.; Nevado, B.; De Meyer, M. Comparative Performances of DNA Barcoding across Insect Orders. *BMC Bioinformatics* **2010**, *11*, 1–10, doi:10/ch2bd9.
